# Supplementary material for: A Loop-Mediated Isothermal Amplification (LAMP) Assay Specific to Trichomonas tenax Is Suitable for Use at Point-of-Care
Source: MDPI journal article supplement (doi:10.3390/microorganisms10030594), 2022-03-10
Supplement: s1 [file s1]

|          |                                                                |     |
|----------|----------------------------------------------------------------|-----|
| KX977528 | -----atcagttctagttataataactaataccaacttctttt                    | 38  |
| U86615   | cggtaggtgaacctgccgttgatcagttctagtttaataactaataccaacttct---t    | 57  |
| U86613   | cggtaggtgaacctgccgttgatcagttctagtttttaataactaacaccaacttc---t   | 57  |
|          | ***** * * * * *                                                |     |
| KX977528 | taattaaatcacaaaacaatacaaatTTaataactaacttcatcaaaaaatcaagtctc    | 98  |
| U86615   | tttattaatcaaaaactaatacaattataaataactaact-tcatcaaaaaatcaagtctc  | 116 |
| U86613   | tttattaacaaaaaccaata-caaaattaaaaactaact-tcatcaaaaacaaagtctc    | 115 |
|          | * * ** ** *** ** * * ** ***** *****                            |     |
| KX977528 | taagcaatggatgtcttggctcctcacacgatgaagaacgtggcataatgtgttaagtaa   | 158 |
| U86615   | taagcaatggatgtcttggctcctcacacgatgaagaacgtggcataatgtgttaagtaa   | 176 |
|          | F3 FIP (F2) LF                                                 |     |
| U86613   | taagcaatggatgtcttggctcctcacacgatgaagaacgtggcataatgtgttaagtaa   | 175 |
|          | *****                                                          |     |
| KX977528 | ccggagttgcaaacatcatgacaggTTaatctttgaatgcaaattgcgctttccc-ggct   | 217 |
| U86615   | ccggagttgcatacatcatgacaggTTaatctttgaatgcaaattgcgcttaaacttggct  | 236 |
|          | FIP (F1c) RIP (B1) LP                                          |     |
| U86613   | ccggagttgcaaacatcatgacaggTTaatctttgaatgcaaattgcgctaaactcgatc   | 235 |
|          | ***** * *                                                      |     |
| KX977528 | tcggccgaggagcatgcgtgtaacagtacaacattaattataataattcttatttctaagc  | 277 |
| U86615   | tcggctgagaagcatgcgtgtaacagtacaacataatttataataattcttatttctaagc  | 296 |
|          | RIP (B2)                                                       |     |
| U86613   | tcggctcgagaagcatgggtgtgacagtactacatcttttataataattcttatttctaagc | 295 |
|          | **** ** ***** ** ***** ** *****                                |     |
| KX977528 | gaataagtaaataaaaattataagacaaacaatacgttTgtctgtatatacgca-----    | 328 |
| U86615   | gaataagtaaataaatt-ataagacaaact-tacgttTgtctgtatatacgcaggaagaccc | 354 |
|          | B3                                                             |     |
| U86613   | gaataagtaaataatat-ataagacaaacaacacgtagtctgccatacgaggaagaccc    | 354 |
|          | ***** * ***** ***** *****                                      |     |
| KX977528 | -----                                                          | 328 |
| U86615   | gctgaactgaagca                                                 | 368 |
| U86613   | gctgaactgaagca                                                 | 368 |

**Figure S1.** Alignment of ITS and 5.8S rRNA sequences of *Trichomonas tenax* (U86615), *T. vaginalis* (U86613) and *T. bixi* (KX977528). LAMP primers are color coded in *T. tenax* sequence.
